# Supplementary material
Source: PubMed Central journal article supplement (PMC7000176)
Supplement: NIHMS1548877-supplement-Supplemental_Material.pdf [file NIHMS1548877-supplement-Supplemental_Material.pdf]

## **SUPPLEMENTAL MATERIALS**

### **Short-Term Exposure to Waterpipe/Hookah Smoke Triggers a Hyperactive Platelet Activation State and Increases the Risk of Thrombogenesis**

Ahmed B. Alarabi, Zubair A. Karim, Jean E Montes Ramirez, Keziah R. Hernandez, Patricia A. Lozano, José O. Rivera, Fatima Z. Alshbool and Fadi T. Khasawneh

1101 N. Campbell St, Pharmaceutical Sciences, School of Pharmacy, The University of Texas El Paso, El Paso, TX 79902

## Major Resources Tables

### Animals (in vivo studies)

| Species | Vendor or Source   | Background Strain | Sex  |
|---------|--------------------|-------------------|------|
| Mouse   | Jackson laboratory | C57BL/6J          | Male |

### Antibodies

| Target antigen                                              | Vendor or Source             | Catalog #  | Working concentration |
|-------------------------------------------------------------|------------------------------|------------|-----------------------|
| PI3K p85 (alpha)<br>MOUSE -<br>MONOCLONAL                   | PROTEINTECH                  | 60225-1-Ig | 2 µg/mL               |
| Akt RABBIT Ab                                               | CELL SIGNALING<br>TECHNOLOGY | 9272S      | 0.1 µg/mL             |
| P-Akt (s473) (587F11)<br>MOUSE mAb                          | CELL SIGNALING<br>TECHNOLOGY | 4051S      | 0.5 µg/mL             |
| p44/42 MAPK (Erk1/2)<br>Rabbit Ab                           | CELL SIGNALING<br>TECHNOLOGY | 9102S      | 0.1 µg/mL             |
| p44/42 MAPK Erk1<br>(Y204)/Erk2 (Y187)<br>(D1H6G) Mouse mAb | CELL SIGNALING<br>TECHNOLOGY | 5726S      | 0.1 µg/mL             |
| Anti-PAR4 antibody                                          | Abcam                        | ab5787     | 2 µg/ml               |
